# Supplementary material for: Luminescence thermometry and field induced slow magnetic relaxation based on a near infrared emissive heterometallic complex
Source: Royal Society of Chemistry journal article supplement (doi:10.1039/d2dt00936f), 2022-01-01
Supplement: d2dt00936f1.pdf [file d2dt00936f1.pdf]

## Supporting Information

# Luminescence Thermometry and Field Induced Slow Magnetic Relaxation based on a Near Infrared Emissive Heterometallic Complex.

Karachousos-Spiliotakopoulos, Konstantinos,<sup>a</sup> Vassilis Tangoulis,<sup>a\*</sup> Nicos Panagiotou,<sup>b</sup> Anastasios Tasiopoulos,<sup>b</sup> Eufemio Moreno-Pineda,<sup>c</sup> Wolfgang Wernsdorfer,<sup>d,e\*</sup> Michael Schulze,<sup>e</sup> Alexandre M. P. Botas,<sup>f</sup> Luis D. Carlos,<sup>f\*</sup>

- a. Department of Chemistry, Laboratory of Inorganic Chemistry, University of Patras, 26504, Patras, Greece.*
- b. Department of Chemistry, University of Cyprus, Nicosia 1678, Cyprus*
- c. Depto. de Química-Física, Escuela de Química, Facultad de Ciencias Naturales, Exactas y Tecnología, Universidad de Panamá, Panamá, Panamá.*
- d. Institute for Quantum Materials and Technology (IQMT), Karlsruhe Institute of Technology (KIT), Hermann-von-Helmholtz-Platz 1, D-76344 Eggenstein-Leopoldshafen, Germany.*
- e. Physikalisches Institut, Karlsruhe Institute of Technology, D-76131 Karlsruhe, Germany.*
- f. Phantom-g, CICECO – Aveiro Institute of Materials, Department of Physics, University of Aveiro, 3810-193 – Aveiro, Portugal*

## FT-IR

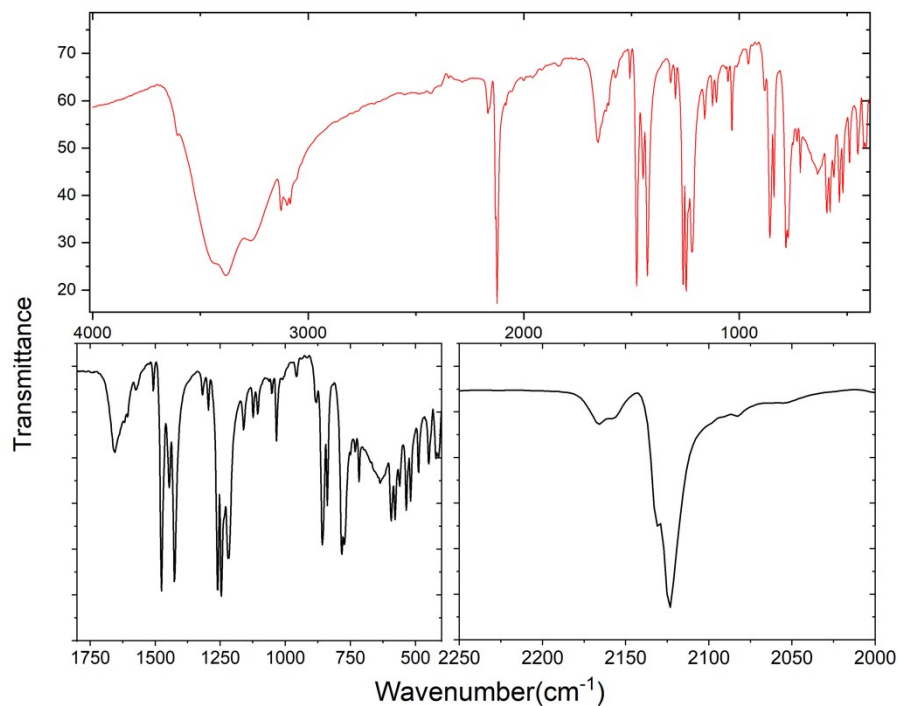

**Figure S1.** IR spectra of  $1 \cdot 4\text{H}_2\text{O}$  in the range  $4000\text{-}400\text{ cm}^{-1}$ . Enlarged regions ( $1600\text{-}400\text{ cm}^{-1}$  and  $2200\text{-}2080\text{ cm}^{-1}$ ) are also presented. The bands in the  $1560\text{-}1420\text{ cm}^{-1}$  region (highlighted region on the left) are assigned to the stretching vibrations of the heterocyclic rings of coordinated bpyO<sub>2</sub>.

## Crystal Packing

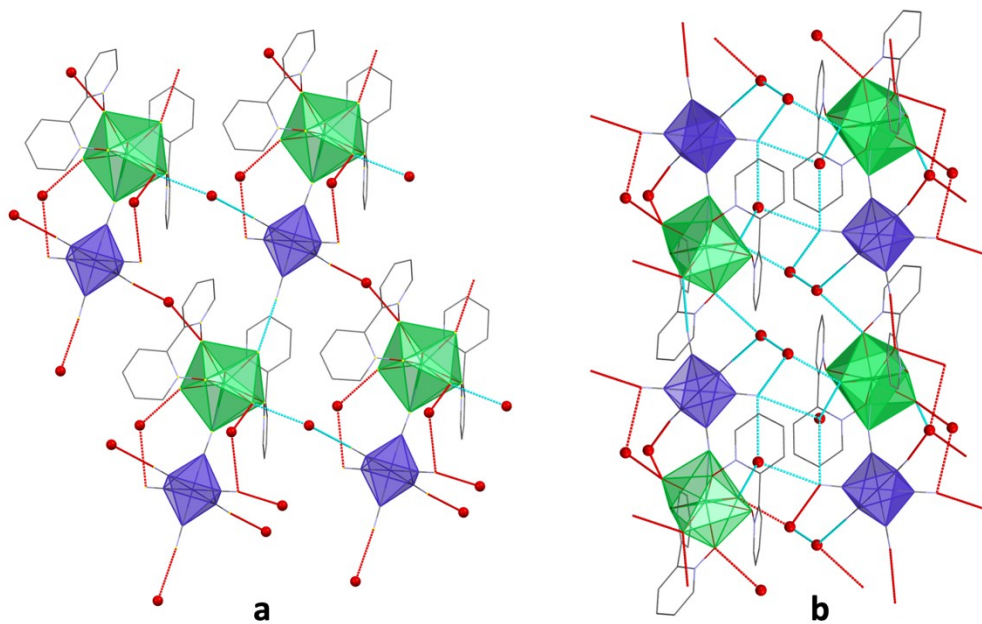

Figure S2. a) A layer of the 3D architecture of compound **1** parallel to the *ab* plane. The O-H $\cdots$ O/N intermolecular H bonds connecting the molecules in the layer are shown in blue and red dotted lines; hanging contacts to atoms on adjacent layers are drawn with red dotted lines. c) interconnected layers through the lattice solvent H<sub>2</sub>O molecules (oxygens are denoted as red solid spheres). The hydrogens of the solvent molecules have not been located.

## Magnetic measurements

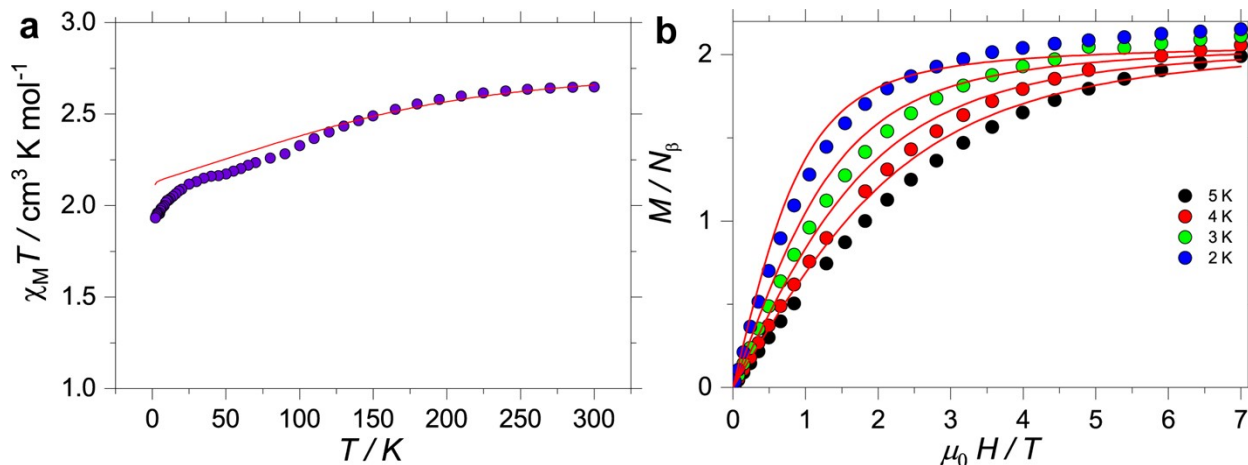

**Figure S3.** (a)  $\chi_M T$  profile for **1** collected with  $H_{DC} = 1$  kOe and (b)  $M(H)$  at different temperatures. Solid lines are simulation obtained employing CASSCF results (see text for details).

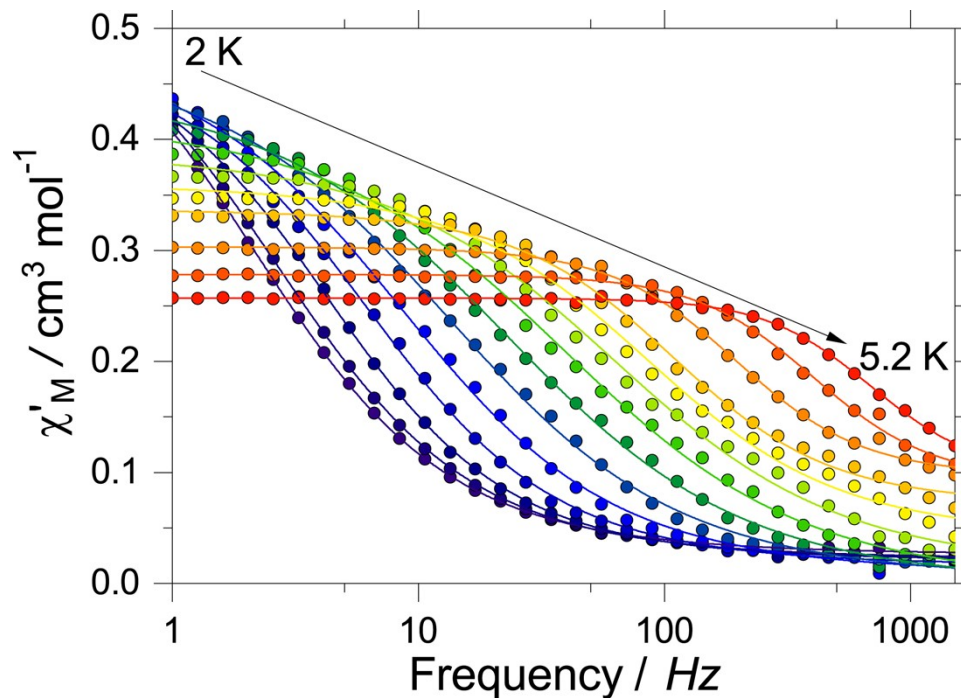

**Figure S4.** In-phase frequency dependent ( $\chi'(\nu)$ ) magnetic susceptibility for **1** obtained with an oscillating field of 3.5 Oe and  $H_{DC} = 1.25$  kOe in the temperature range of 2 to 5.2 K and employing frequencies between 1 to 1512 Hz.

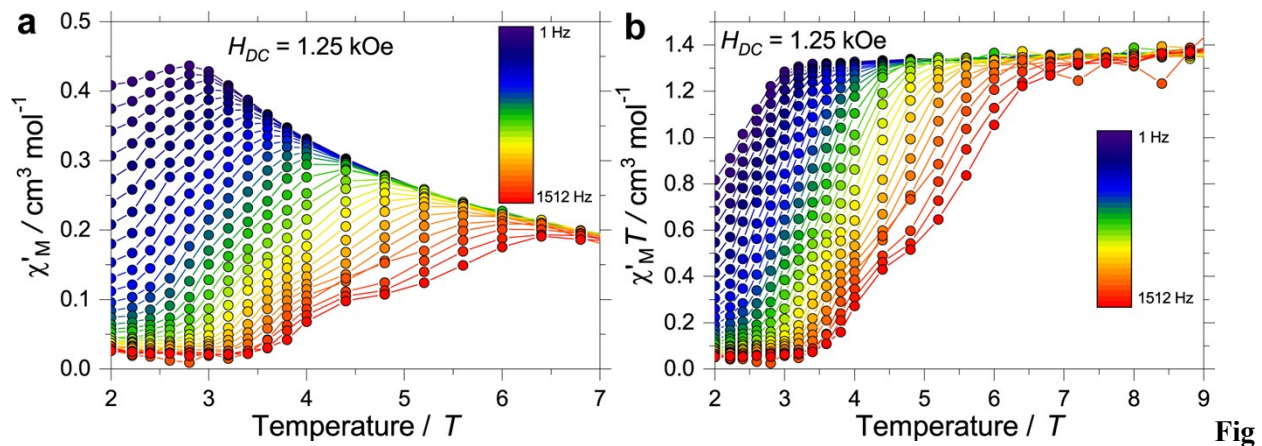

**Figure S5.** (a) In-phase temperature dependent ( $\chi'_M(T)$ ) magnetic susceptibility and (b) ( $\chi'_M T(T)$ ) for **1** obtained employing an oscillating field of 3.5 Oe and  $H_{DC} = 1.25$  kOe.

## Luminescence Thermometry

The relative thermal sensibility ( $S_r$ ) and the temperature uncertainty ( $\delta T$ ) are defined as:<sup>1</sup>

$$S_r = \frac{1}{\Delta} \left| \frac{\partial \Delta}{\partial T} \right| \quad \text{and} \quad \delta T = \frac{1}{S_r} \left| \frac{\delta \Delta}{\Delta} \right| \quad (S1)$$

where  $\frac{\delta \Delta}{\Delta}$  is the relative uncertainty in  $\Delta$ . The temperature uncertainty was obtained considering the experimental uncertainty associated with the thermometric parameter as:

$$(\delta \Delta)^2 = \left( \frac{\partial \Delta}{\partial I_1} \delta I_1 \right)^2 + \left( \frac{\partial \Delta}{\partial I_2} \delta I_2 \right)^2 = \Delta^2 \left[ \left( \frac{\delta I_1}{I_1} \right)^2 + \left( \frac{\delta I_2}{I_2} \right)^2 \right] \quad (S3)$$

where  $\delta I_1$  and  $\delta I_2$  are the uncertainties in  $I_1$  and  $I_2$ , respectively, determined considering the standard error ( $SE = 1 \times 10^5$ ) of the mean value of the noise signal of the spectrum (measured at

16 K in the 5882-8000  $cm^{-1}$  range), taken  $SE = \frac{\sigma}{\sqrt{N}}$ , where  $\sigma$  is the standard derivation and

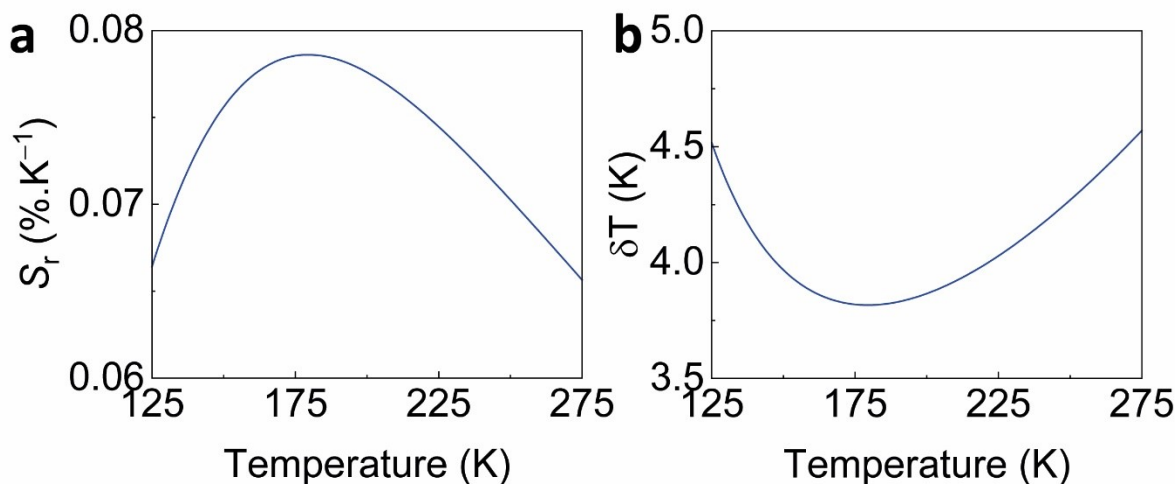

$N = 577$  is the number of points.

**Figure S6.** Temperature dependence of (a)  $S_r$  and (b)  $\delta T$ .

1. C. D. S. Brites, A. Millán, L. D. Carlos, Lanthanides in Luminescent Thermometry. In Handbook on the Physics and Chemistry of Rare Earths, Gshneidner, K. A.; Bünzli, J.-C.; Pecharsky, V., Eds. Elsevier: 2016; Vol. 48, pp 339-427.

## Crystallographic Data

**Table S1.** Crystallographic Data for Complex **1**·4H<sub>2</sub>O,

|                                            |                                                                                 |
|--------------------------------------------|---------------------------------------------------------------------------------|
| Empirical formula                          | C <sub>26</sub> H <sub>16</sub> CoN <sub>10</sub> O <sub>11</sub> Yb            |
| Formula weight                             | 876.46                                                                          |
| Temperature [K]                            | 100(2)                                                                          |
| Wavelength [Å]                             | 0.71073                                                                         |
| Crystal system                             | Triclinic                                                                       |
| Space group                                | P -1                                                                            |
| a [Å]                                      | 10.1974(4)                                                                      |
| b [Å]                                      | 12.2711(5)                                                                      |
| c [Å]                                      | 13.8414(5)                                                                      |
| a [°]                                      | 85.275(3)                                                                       |
| b [°]                                      | 87.856(3)                                                                       |
| c [°]                                      | 70.730(4)                                                                       |
| Volume [Å <sup>3</sup> ]                   | 1629.33(12)                                                                     |
| Z                                          | 2                                                                               |
| Density (calculated)[ g/cm <sup>3</sup> ]  | 1.786                                                                           |
| Absorption coefficient [mm <sup>-1</sup> ] | 3.434                                                                           |
| F(000)                                     | 854                                                                             |
| Crystal size [mm <sup>3</sup> ]            | 0.120 x 0.075 x 0.055                                                           |
| Theta range for data collection [deg]      | 3.326 to 27.498                                                                 |
| Reflections collected                      | 23274                                                                           |
| Independent reflections                    | 7335 [R(int) = 0.0669]                                                          |
| Completeness to theta = 25.242°            | 99.8 %                                                                          |
| Refinement method                          | Full-matrix least-squares on F <sup>2</sup>                                     |
| Data / restraints / parameters             | 7335 / 0 / 442                                                                  |
| Goodness-of-fit on F <sup>2</sup>          | 1.055                                                                           |
| Final R indices [I>2sigma(I)]              | R <sub>obs</sub> <sup>a</sup> = 0.0388, wR <sub>obs</sub> <sup>b</sup> = 0.0797 |
| R indices (all data)                       | R <sub>all</sub> = 0.0480, wR <sub>all</sub> = 0.0847                           |
| <u>Deposition Number</u>                   | <u>2159777</u>                                                                  |

$^aR = \Sigma||F_o|-|F_c|| / \Sigma|F_o|$ ,  $wR = \{\Sigma[w(|F_o|^2 - |F_c|^2)^2] / \Sigma[w(|F_o|^4)]\}^{1/2}$  and  $^bw=1/[\sigma^2(F_o^2)+(mP)^2+nP]$  where  $P=(F_o^2+2F_c^2)/3$  and  $m$  and  $n$  are constants

**Table S2.** Selected Interatomic Distances (Å) and Angles (deg) for **1·4H<sub>2</sub>O**,

|             |            |
|-------------|------------|
| Distance    |            |
| Yb···Co1    | 5.425(1)   |
| O(1)-Yb(1)  | 2.346(3)   |
| O(2)-Yb(1)  | 2.288(3)   |
| O(3)-Yb(1)  | 2.361(3)   |
| O(4)-Yb(1)  | 2.246(3)   |
| O(5)-Yb(1)  | 2.325(3)   |
| O(6)-Yb(1)  | 2.323(3)   |
| O(7)-Yb(1)  | 2.323(3)   |
| N(5)-Yb(1)  | 2.424(4)   |
| Co1-C21     | 1.889(5)   |
| Co1-C22     | 1.907(5)   |
| Co1-C23     | 1.907(5)   |
| Co1-C24     | 1.881(5)   |
| Co1-C25     | 1.906(5)   |
| Co1-C26     | 1.905(5)   |
| Angle       |            |
| O1-Yb-O2    | 71.61(11)  |
| O3-Yb-O4    | 74.27(11)  |
| O5-Yb-O6    | 72.14(10)  |
| O6-Yb-O7    | 144.45(11) |
| O2-Yb-N5    | 103.76(12) |
| O4-Yb-N5    | 88.92(13)  |
| Yb-N5-C21   | 165.9(4)   |
| C21-Co1-C26 | 177.80(19) |
| C22-Co1-C24 | 179.0(2)   |
| C23-Co1-C25 | 178.3(2)   |
| Co1-C21-N5  | 177.0(4)   |
| Co1-C26-N10 | 178.6(4)   |



**Table S3.** Continuous Shape Measures (CShM) values for the potential coordination polyhedra of the Ln<sup>III</sup> ion in the structure of complex **1**·4H<sub>2</sub>O

| CShM value <sup>a</sup> | Symmetry                     | Polyhedron                                 |
|-------------------------|------------------------------|--------------------------------------------|
| <b>1</b>                |                              |                                            |
| 32.231                  | <i>D</i> <sub>8h</sub>       | Octagon                                    |
| 23.167                  | <i>C</i> <sub>7v</sub>       | Heptagonal pyramid                         |
| 15.012                  | <i>D</i> <sub>6h</sub>       | Hexagonal bipyramid                        |
| 11.809                  | <i>O</i> <sub>h</sub>        | Cube                                       |
| 2.350                   | <i>D</i> <sub>4d</sub>       | Square antiprism                           |
| <b>0.929</b>            | <b><i>D</i><sub>2d</sub></b> | <b>Triangular dodecahedron</b>             |
| 12.316                  | <i>D</i> <sub>2d</sub>       | Johnson gyrobifastigium J26                |
| 28.752                  | <i>D</i> <sub>3h</sub>       | Johnson elongated triangular bipyramid J14 |
| 2.084                   | <i>C</i> <sub>2v</sub>       | Biaugmented trigonal prism J50             |
| 1.429                   | <i>C</i> <sub>2v</sub>       | Biaugmented trigonal prism                 |
| 2.941                   | <i>D</i> <sub>2d</sub>       | Snub diphenoid J84                         |
| 12.622                  | <i>T</i> <sub>d</sub>        | Triakis tetrahedron                        |
| 25.220                  | <i>D</i> <sub>3h</sub>       | Elongated trigonal bipyramid               |

<sup>a</sup> The polyhedron with the smallest CShM value (in bold) is the real coordination polyhedron of the Ln<sup>III</sup> center in the complex.
